# Supplementary material for: A fluorescence visual detection for glyphosine based on a biomass carbon quantum dot paper-based sensor
Source: Royal Society of Chemistry journal article supplement (doi:10.1039/d3nj00795b), 2023-01-01
Supplement: d3nj00795b1.pdf [file d3nj00795b1.pdf]

Supplementary material for

## **A fluorescence visual detection for glyphosine based on biomass carbon quantum dots paper-based sensor**

Xiaoyan Wang<sup>a</sup>, Yiju Lv<sup>a</sup>, Xiangfei Kong<sup>a</sup>,

Zhiyuan Ding<sup>a</sup>, Xia Cheng<sup>a</sup>, Zheng Liu<sup>a,\*</sup>, Guo-Cheng Han<sup>b,1\*</sup>

<sup>a</sup> College of Chemical and Biological Engineering, Guilin University of Technology, Guangxi Key Laboratory of Electrochemical and Magneto-chemical Functional Materials, Guilin, 541004, PR China

<sup>b</sup> School of Life and Environmental Sciences, Guilin University of Electronic Technology, Guilin, 541004, PR China

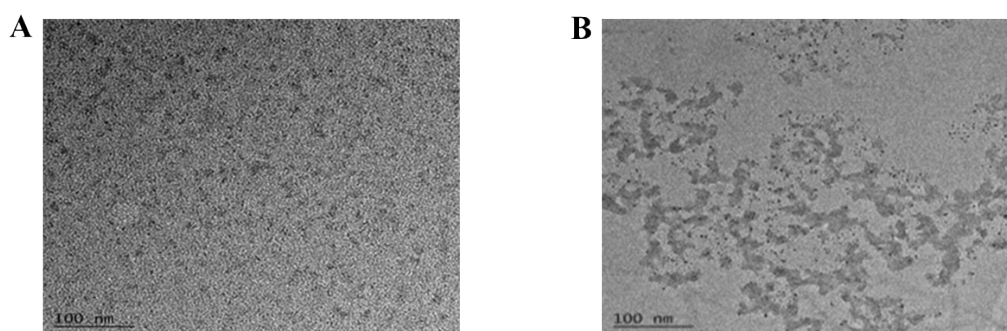

Fig. S1. TEM images of N-CQDs (A) and N-CQDs/Fe<sup>3+</sup> (B).

---

<sup>1\*</sup> Corresponding author. E-mail address: [lisa4.6@163.com](mailto:lisa4.6@163.com) (Z. Liu), [hanc1981@163.com](mailto:hanc1981@163.com) (G.-C. Han)

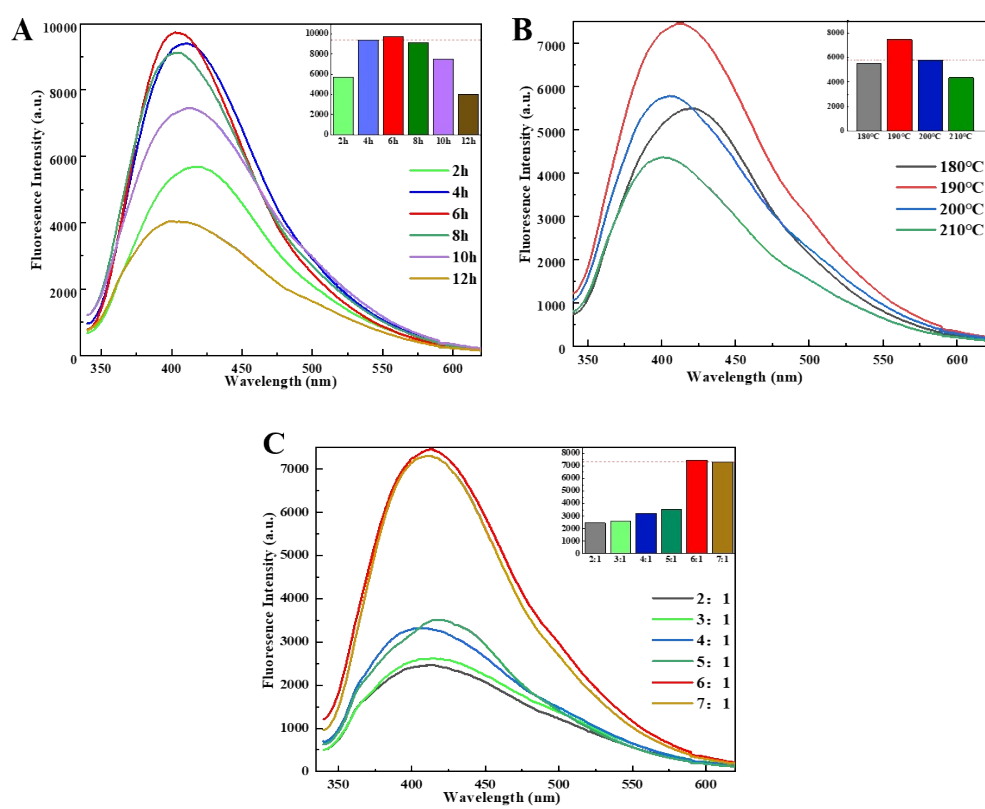

Fig. S2. (A) Optimization of the ratio (tea shell powder: melamine), (B) Optimization of reaction temperature, (C) Optimization of reaction time.

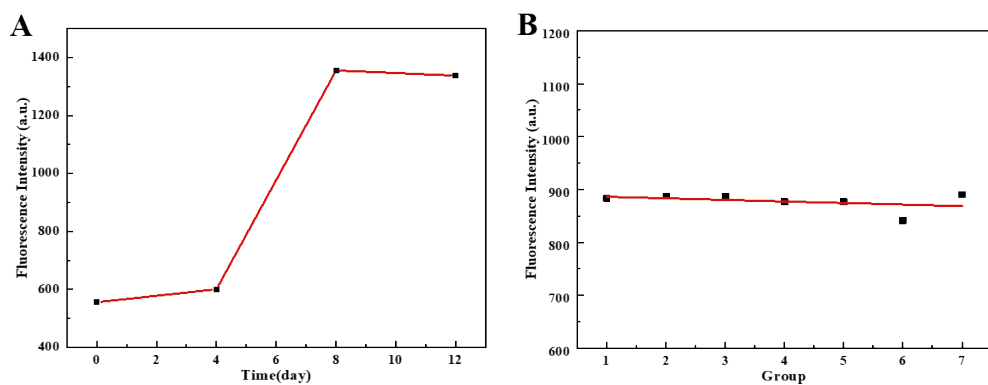

Fig. S3. The stability (A) and the precision (B) of the fluorescent probe in the absence and presence of interfering substance).
